# Supplementary material for: Exploring the role of differentially expressed metabolic genes and their mechanisms in bone metastatic prostate cancer
Source: PeerJ journal article supplement (doi:10.7717/peerj.15013), 2023-04-12
Supplement: rawdata_and_plot_all.zip [file rawdata.xlsx]

## Sheet: A
Well	Sample	2-△△Ct	mean	SD
NC	CRISP3	1.031
NC	CRISP3	0.998	1.00833	0.0196554
NC	CRISP3	0.996
EV	CRISP3	0.997
EV	CRISP3	1.036	1.01367	0.020108
EV	CRISP3	1.008
OE-CRISP3	CRISP3	4.225
OE-CRISP3	CRISP3	3.912	4.18833	0.259947
OE-CRISP3	CRISP3	4.428
CRISP3 si-1	CRISP3	0.227
CRISP3 si-1	CRISP3	0.138	0.162333	0.0565715
CRISP3 si-1	CRISP3	0.122
CRISP3 si-2	CRISP3	0.129
CRISP3 si-2	CRISP3	0.213	0.187667	0.050964
CRISP3 si-2	CRISP3	0.221

## Sheet: B
	CCK8
	NC			EV			OE-CRISP3			CRISP3 si-1			CRISP3 si-2
0	0.283	0.241	0.248	0.192	0.224	0.256	0.224	0.281	0.263	0.145	0.278	0.284	0.193	0.244	0.23
1	0.469	0.537	0.475	0.529	0.33	0.591	0.773	0.768	0.863	0.527	0.381	0.566	0.322	0.371	0.486
2	1.034	0.8	0.799	0.861	1.176	0.921	1.797	1.842	1.577	0.824	0.881	0.787	0.948	0.965	1.026
3	1.746	1.735	1.764	1.794	1.677	1.76	2.237	2.83	2.416	1.093	1.121	1.056	1.383	1.566	1.479
	NC			EV			OE-CRISP3			CRISP3 si-1			CRISP3 si-2
	mean value	standard deviation	n	mean value	standard deviation	n	mean value	standard deviation	n	mean value	standard deviation	n	mean value	standard deviation	n
0	0.257333	0.0225019	3	0.224	0.032	3	0.256	0.0291376	3	0.235667	0.0785769	3	0.222333	0.0263502	3
1	0.493667	0.0376475	3	0.483333	0.136361	3	0.801333	0.0534634	3	0.491333	0.0975209	3	0.393	0.0841843	3
2	0.877667	0.13539	3	0.986	0.167257	3	1.73867	0.141804	3	0.830667	0.0473533	3	0.979667	0.0410163	3
3	1.74833	0.0146401	3	1.74367	0.0601858	3	2.49433	0.304162	3	1.09	0.0326037	3	1.476	0.0915369	3
						0.214018			0.952991			0.669978			0.794324
						0.905425			0.00123245			0.971013			0.25669
						0.432432			4.01715e-05			0.600672			0.0146183
						0.902475			0.000534277			5.75301e-06			0.00233817

## Sheet: C
	Scratch assay
	NC	EV	OE-CRISP3
1	41.53	44.51	79.11
2	47.05	46.22	76.71
3	38.37	42.74	70.41
	Recovery percentage (％)

## Sheet: D
Well	Sample	2-△△Ct	mean	SD
NC	β-catenin	1
NC	β-catenin	1.037	1.002	0.0340441
NC	β-catenin	0.969
EV	β-catenin	0.874
EV	β-catenin	0.943	0.919667	0.0395517
EV	β-catenin	0.942
OE-CRISP3	β-catenin	3.081
OE-CRISP3	β-catenin	3.351	2.91833	0.532955
OE-CRISP3	β-catenin	2.323
CRISP3 si-1	β-catenin	0.492
CRISP3 si-1	β-catenin	0.411	0.462	0.0443959
CRISP3 si-1	β-catenin	0.483
CRISP3 si-2	β-catenin	0.547
CRISP3 si-2	β-catenin	0.561	0.538333	0.0280238
CRISP3 si-2	β-catenin	0.507
Well	Sample		mean	SD
NC	Snail	1
NC	Snail	0.951	0.97	0.0262869
NC	Snail	0.959
EV	Snail	0.912
EV	Snail	0.918	0.918667	0.00702377
EV	Snail	0.926
OE-CRISP3	Snail	3.224
OE-CRISP3	Snail	2.776	2.744	0.496774
OE-CRISP3	Snail	2.232
CRISP3 si-1	Snail	0.202
CRISP3 si-1	Snail	0.476	0.33	0.137884
CRISP3 si-1	Snail	0.312
CRISP3 si-2	Snail	0.415
CRISP3 si-2	Snail	0.273	0.364	0.079
CRISP3 si-2	Snail	0.404
Well	Sample		mean	SD
NC	Vimentin	1
NC	Vimentin	0.935	0.991333	0.0525389
NC	Vimentin	1.039
EV	Vimentin	0.843
EV	Vimentin	0.845	0.842	0.00360555
EV	Vimentin	0.838
OE-CRISP3	Vimentin	2.116
OE-CRISP3	Vimentin	1.857	2.09233	0.224438
OE-CRISP3	Vimentin	2.304
CRISP3 si-1	Vimentin	0.673
CRISP3 si-1	Vimentin	0.628	0.635333	0.0345881
CRISP3 si-1	Vimentin	0.605
CRISP3 si-2	Vimentin	0.711
CRISP3 si-2	Vimentin	0.694	0.721	0.0331512
CRISP3 si-2	Vimentin	0.758
